# Supplementary material
Source: PubMed Central journal article supplement (PMC2814316)
Supplement: NIHMS82806-supplement-01.pdf [file NIHMS82806-supplement-01.pdf]

Supplemental Figure for online distribution.

ctg<sup>tgctt</sup>cgatgatggagaacctaatacggggaaggaatccccacaatatcagagaagtcctt 5  
65

gtaaggaggcccgtgcagcacttcggaagaggcctgaagaagagt<sup>E2</sup>gagcccgctacatga 125  
aaagaatgcaagtcaaagtgccacagcctagaagtcttcagagacaggagtgactagca 185

<sup>E3</sup>atg<sup>atg</sup>cagtgcctggagaccaccaaacggaagctcatcggccgcctggtgccatgccgc 245  
M Q C L E M T T K R K L I G R L V P C R 20

tgcttccgctggcgaggaagagatcatctcgggtgttgattactcccactgcagcctgcaa 305  
C F R G E E E I I S V L D Y S H C S L Q 40

caggtgcccgaaggaggtcttcaacttcgaacgtacactagaagagctctatctagatgcc 365  
Q V P K E V F N F E R T L E E L Y L D A 60

aatcagattgaggagctacccaagcaattgttcaactgtcaagctctaaggaaactaagc 425  
N Q I E E L P K Q L F N C Q A L R K L S 80

attcctgataatgacctctcaagtctgccgacctccattgctagcctagttaatctgaaa 485  
I P D N D L S S L P T S I A S L V N L K 100

gaactcgacatcagtaaaaacggtgtacaagaatttcagaaaacataaagtgctgtaag 545  
E L D I S K N G V Q E F P E N I K C C K 120

tgtttaaccattattgaagccagtgtaaatcccatttctaactaccgatggcttcacg 605  
C L T I I E A S V N P I S K L P D G F T 140

cagcttcttaacctgaccagctctacctgaatgacgccttccctcgaatttctccagct 665  
Q L L N L T Q L Y L N D A F L E F L P A 160

aattttggaagacttgtcaaattgccaatcctggagttaagagaaaatcacttgaaaact 725  
N F G R L V K L R I L E L R E N H L K T 180

ctaccaaaagtcaatgcacaagctggcccagctggaaagacttgacctaggcaataatgaa 785  
L P K S M H K L A Q L E R L D L G N N E 200

ttcagcagagctgctgaagttctggatcaaattcagaatttgaggagctgtggatggat 845  
F S E L P E V L D Q I Q N L R E L W M D 220

aacaacgcattgcaagtgcctgctgggtctataggggaagttaaagatggttggatatacctg 905  
N N A L Q V L P G S I G K L K M L V Y L 240

gatatgtcaaaaaacaggatagaaaacgggttgacatggatatttctggatgtgaagccctc 965  
D M S K N R I E T V D M D I S G C E A L 260

gaggacctcttactatcatccaatatggttgcaacagctgccggactctataggattgctg 1025  
E D L L L S S N M L Q Q L P D S I G L L 280

aaaaagttaacaactctaaaagtagatgacaatcagcttacaatgctaccaacacaatc 1085  
K K L T T L K V D D N Q L T M L P N T I 300

ggaaacttatctttattagaagaattcgactgcagttgcaatgagctggagtccctccct 1145  
G N L S L L E E F D C S C N E L E S L P 320

cccaccattggttacctgcacagcctgcgaaccttagctgtggacgagaatttccctccca 1205  
P T I G Y L H S L R T L A V D E N F L P 340

Supplemental Figure for online distribution.

gagttgccagagaaaattggaagctgtaagaacgctcacggttatgtctctacgctccaat 1265  
E L P R E I G S C K N V T V M S L R S N 360

aagctagaattttcttctgaagaaatcgggcagatgcagagacttcgagctttaaatact 1325  
K L E F L P E E I G Q M Q R L R V L N L 380

agtgataataggttgaagaacttgccattctccttcaccaaactcaaagagcttgagca 1385  
S D N R L K N L P F S F T K L K E L A A 400

ttgtggctttctgacaatcagttccaaggccctcatccctctgcaaacagaagcccatcca 1445  
L W L S D N Q S K A L I P L Q T E A H P 420

gaaaccaagcaaagggtactgaccaactacatgtttccccagcagccccgtggtgatgaa 1505  
E T K Q R V L T N Y M F P Q Q P R G D E 440

gatttccagtcagacagcgacagcttcaacccaccctgtgggaggagcagagacaacag 1565  
D F Q S D S D S F N P T L W E E Q R Q Q 460

cgcatgactgttgccctttgaatttgaggataaaaaagaagatgacgaaagtgtgggaaa 1625  
R M T V A F E F E D K K E D D E S A G K 480

gttaaggctctctcctgccaagccccctgggacaggggcccagcgtgggattactctcaa 1685  
V K A L S C Q A P W D R G Q R G I T L Q 500

cctgccaggctgtctggcgattgctgcacaccatgggcccaggtgtgatcagcagatccaa 1745  
P A R L S G D C C T P W A R C D Q Q I Q 520

gatatgcccgtccccagagtgacccccagctggcatggggttgataagtggcctccag 1805  
D M P V P Q S D P Q L A W G C I S G L Q 540

caggagaggagcatgtgtgctccattaccagtggcagcccaatccaccactcttccctct 1865  
Q E R S M C A P L P V A A Q S T T L P S 560

ctaagtggcagacaggttgaataaacctaaaacgatatccaactccttaccggaggat 1925  
L S G R Q V E I N L K R Y P T P Y P E D 580

ttaaagaacatggtaaaatctgttcaaaaatctggtgggtaagccaagccatggagtgcgc 1985  
L K N M V K S V Q N L V G K P S H G V R 600  
gttgagaacgcaaaccacagctaacacggagcaaaactgtgaaagaaaagttgaaacac 2045  
V E N A N P T A N T E Q T V K E K F E H 620

aagtggccggtggcccaagagattacagtgaggattcttttgttcatccagctaaat 2105  
K W P V A P K E I T V E D S F V H P A N 640  
Cf E15 G F F C S S S \*

gaaatgaggattggggaacttcacccttcattagctgagaccctctgtaccacccaaa 2165  
E M R I G E L H P S L A E T P L Y P P K 660

cttgttctgctagggaggacaaaaaagatcaactgatgagtctgaagttgacaaaact 2225  
L V L L G K D K K E S T D E S E V D K T 680  
Cf E16 N Q L M S L K L T K L

cactgtctgataaacagtgctcctcagcactactcagactactcgccctcccaggct 2285  
H C L N N S V S S G T Y S D Y S P S Q A 700  
T V \* CfE19 V S P Q A P T Q T T R P P R L

Jiao et al., 2008. Developmentally-regulated alternative splicing of densin modulates protein-protein interaction and subcellular localization. (JNC-W-2008-0001)

Supplemental Figure for online distribution.

```
tcctcagcatcctccaacacccgggtgaagtggggctccttgagccaacaactaaagat 2345
S S A S S N T R V K V G S L Q P T T K D 720
P Q H P P T P G *
gccgtgcataactctttgtggggtaacaggattgcaccacctttcccacagcctctagat 2405
A V H N S L W G N R I A P P F P Q P L D 740
caaagccattactcacccaacgggaggctgtccctccagggaaacctccccagcgtcct 2465
A K P L L T Q R E A V P P G N L P Q R P 760
gatcggctgccaatgagtgatgctttccctgacaactggaccgatggctcccattacgat 2525
D R L P M S D A F P D N W T D G S H Y D 780
aacacaggttttgtctccgaggaagccacaggcgagaatgccaacaataaccctctctta 2585
N T G F V S E E A T G E N A N N N P L L 800
agctccaaggctagaagcgtacctgctcatgggcgaggcctttaatcaggcaagaaggg 2645
S S K A R S V P A H G R R P L I R Q E R 820
attgtcgggtgttcccctggaactggagcagtcacccacagacacacaccagaaacagaa 2705
I V G V P L E L E Q S T H R H T P E T E 840
gtgctccttccaatccctggcagaattggaccagaacccccagtcatttgaggacagg 2765
V P P S N P W Q N W T R T P S P F E D R 860
actgcttttccctccaaattagaacaaccctactaccagtccttgctgaaagaaaa 2825
T A F P S K L E T T P T T S P L P E R K 880
gaccacatgaaggagcctacagagacaccaggtcccttttctccgggagtgccatgggag 2885
D H M K E P T E T P G P F S P G V P W E 900
taccagaccccccccccaaccggaggtctcggtaatgtcttttctcaaattccactgccgc 2945
Y H D P T P N R S L G N V F S Q I H C R 920
ccagattcgtctaaagggttattgcaattagcaaaagcacggagaggctttccccgctc 3005
P D S S K G V I A I S K S T E R L S P L 940
atgaaagatataaagtccaacaagttcaaaaagtcccagagtattgatgagattgacgtc 3065
M K D I K S N K F K K S Q S I D E I D V 960
ggtacctacaaggtctataacattccactggaaaactatgcctctggaagcgatcactta 3125
G T Y K V Y N I P L E N Y A S G S D H L 980
ggaagccacgagcggccagacaagttcttgggaccagagcacggcatgtccagtatgtcc 3185
G S H E R P D K F L G P E H G M S S M S 1000
aggagccagtcggtacccatgctggatgacgaaatgctcatgtacggaagtagtaaaggc 3245
R S Q S V P M L D D E M L M Y G S S K G 1020
ccacccaacaaaaagcatctatgactaagaaggtctatcagtttgaccaaagcttcaat 3305
P P Q Q K A S M T K K V Y Q F D Q S F N 1040
ccacaaggagcgggtggaagtaaaagcagagaagaggatcccacccccttttgacacaat 3365
P Q G A V E V K A E K R I P P P F A H N 1060
tctgagtatgtacaacagcccggtaaaaacatcgccaaggatctcgtcagccccagagcc 3425
S E Y V Q Q P G K N I A K D L V S P R A 1080
```

Jiao et al., 2008. Developmentally-regulated alternative splicing of densin modulates protein-protein interaction and subcellular localization. (JNC-W-2008-0001)

Supplemental Figure for online distribution.

|                                                                 |            |
|-----------------------------------------------------------------|------------|
| tatagaggataccacccatggagcagatgttctccttttcccaaccatctgtaaagag      | 3485       |
| Y R G Y P P M E Q M F S F S Q P S V N E                         | 1100       |
| gatgccatggtgaatgctcagttcgccagccaggggccagggcaggcttcctaaggagg     | 3545       |
| D A M V N A Q F A S Q G P R A G F L R R                         | 1120       |
| gctgactccctggccagctccacagagatggccatgttcagaaggggtcagtgagccccac   | 3605       |
| A D S L A S S T E M A M F R R V S E P H                         | 1140       |
| gagctgccccctggtgacaggtatggccgagcagcctataggggagggctggaaggccag    | 3665       |
| E L P P G D R Y G R A A Y R G G L E G Q                         | 1160       |
| agcagcgtttcaatgactgatcccccaattcctcaagaggaatggcaggtacgaagatgag   | 3725       |
| S S V S M T D P Q F L K R N G R Y E D E                         | 1180       |
| cacccttcatatcaagaagtgaaagcgcagggcggaagtcttctgctaaaaaccttacc     | 3785       |
| H P S Y Q E V K A Q A G S F P A K N L T                         | 1200       |
| cagaggaggccactgtctgccaggagctacagcacagagagttacggggcctcccaaacc    | 3845       |
| Q R R P L S A R S Y S T E S Y G A S Q T                         | 1220       |
| aggccagtttcagctaggcctaccatggcagccctcctggaaaaataaccatctgactat    | 3905       |
| R P V S A R P T M A A L L E K I P S D Y                         | 1240       |
| aacttgggtaactatggtgacaagacatcagataacagtgatataaagacaaggcccacc    | 3965       |
| N L G N Y G D K T S D N S D I K T R P T                         | 1260       |
| cctgtgaagggagaggagagctgtggcaaaatgccggcagactggagacagcagctgctt    | 4025       |
| P V K G E E S C G K M P A D W R Q Q L L                         | 1280       |
| agacatatagaagctagaaggttagacaggaacgctgcttacaacacacacagttaac      | 4085       |
| R H I E A R R L D R N A A Y K H N T V N                         | 1300       |
| cttggcatgctgcctatggaggatattcagcaatgcatgcaggcagaagcatgacttta     | 4145       |
| L G M L P Y G G I S A M H A G R S M T L                         | 1320       |
| aacttgcagactaagtctaaatttgaccttaagacctacctcttcagaaaaccccgctcc    | 4205       |
| N L Q T K S K F D L Q D L P L Q K T P S                         | 1340       |
| cagcaaagcaacatttttagacaatggacaagaagatgtctctcctagtggccaatggaat   | 4265       |
| Q Q S N I L D N G Q E D V S P S G Q W N                         | 1360       |
| ccttaccacttgggagggcgggatgtacctccggacaccattactaaaaagccaggcagc    | 4325       |
| P Y P L G R R D V P P D T I T K K A G S                         | 1380       |
|                                                                 | Cf E21 A A |
| cacattcagaccctgagatgggggtcacagagccttcagcaccgcagccgggagcagcagcca | 4385       |
| H I Q T L M G S Q S L Q H R S R E Q Q P                         | 1400       |
| T F R P *                                                       |            |
| tatgaaggaacatcaacaaagtgaccattcagcagttccagtcgccactgccatccag      | 4445       |
| Y E G N I N K V T I Q Q F Q S P L P I Q                         | 1420       |
| atccccctcatcacaggccaccggggacccccagcctggacgggtgcttaattcaaacgaaa  | 4505       |
| I P S S Q A T R G P Q P G R C L I Q T K                         | 1440       |

**Jiao et al., 2008.** Developmentally-regulated alternative splicing of densin modulates protein-protein interaction and subcellular localization. (JNC-W-2008-0001)

Supplemental Figure for online distribution.

|                                                                |             |
|----------------------------------------------------------------|-------------|
| gggcagaggagtatggacggttatccccgagcagtttctgtgtgaatagaaaagaaccct   | 4565        |
| G Q R S M D G Y P E Q F C V R I E K N P                        | <b>1460</b> |
| Cf E20 S S V *                                                 |             |
|                                                                |             |
| gggcttggatttagtatcagcgggtggaattagtgggcaaggaaatcctttcaaacccttc  | 4625        |
| G L G F S I S G G I S G Q G N P F K P S                        | <b>1480</b> |
|                                                                |             |
| gacaagggtatcctttgttactaggggttcagcctgatggaccagcatccaaccttctacag | 4685        |
| D K G I F V T R V Q P D G P A S N L L Q                        | <b>1500</b> |
|                                                                |             |
| ccccggggataaaaatccttcaggcaaatggacacagttttgtgcatatggaacacgaaaaa | 4745        |
| P G D K I L Q A N G H S F V H M E H E K                        | <b>1520</b> |
|                                                                |             |
| gctgttttactactgaagagcttccagaacacagtagacctagttattcaacgtgagctc   | 4805        |
| A V L L L K S F Q N T V D L V I Q R E L                        | <b>1540</b> |
| actgtctaaatggtttttataaatagtgaagatatgtcaggccagagataatgtttaaaaa  | 4865        |
| T V *                                                          | <b>1542</b> |
|                                                                |             |
| taaatttatacatagaaaacaaatgttccagttgctgaccaatggcaaacatcagtgcc    | 4925        |
| ggtgtataatattgtacgttagccttgaccaccctggaaaatgttacttataatcacggc   | 4985        |
| gtttgcgcggttctgtatcagttccagcggagcctctggctgtgcattgggtgcggttttg  | 5045        |
| tttctgtttttgtttttgtttttgttttttaaaatcaaataagttgtcttctcaaagtg    | 5105        |
| gatttcctatcattttggagcacggaagcacacacaagctctttacaagttatgctctcc   | 5165        |
| atcagagatactgcctcaaaaaaattgtatataaagagttgtaaccccataaagtattt    | 5225        |
| ctagcacaaggtatatgttggcatg                                      | 5250        |

**Notes:**

- 1) The nucleotide sequence of the predicted longest mRNA variant of densin is shown along with the resulting amino acid sequence below. Nucleotides and amino acids are numbered at the right in normal and bold font, respectively, based on the longest theoretical sequence.
- 2) The beginning of each exon is indicated with a solid arrow and cryptic starts are indicated as dashed arrows. Each star site is labeled with the corresponding exon number (E#). The splice donor exon for the alternative splicing events is indicated by "Cf" (continues from).
- 3) Nucleotide sequences of exons that are known to be alternatively spliced are indicated in blue. The corresponding amino acid sequences are in red if skipping of the exon would shift the reading frame and in green if the reading frame remains the same.
- 4) The conventional start and stop codons for the longest variant are highlighted in solid green and red boxes, respectively. An alternative start codons due to frame shift splicing is indicated by an open green box. Novel stop codons created by frame shift splicing are indicated by open colored boxes to match a second line of colored amino acid sequence showing the novel downstream residues underneath the "normal" residues. [For the skipping of Exon21-24 (CfE20), the first novel amino acid is Ser which is encoded by the last two bases in E20 and the first base in E25: for simplicity, this Ser is shown under E25, along with the rest of the novel C-terminal domain.)
